# Supplementary material for: Printed Silk Microelectrode Arrays for Electrophysiological Recording and Controlled Drug Delivery
Source: PubMed Central journal article supplement (PMC11468847; doi:10.1002/adhm.202202869), 2023-03-03
Supplement: ADHM-12-2202869-s001.pdf [file ADHM-12-2202869-s001.pdf]

# ADVANCED HEALTHCARE MATERIALS

## Supporting Information

for *Adv. Healthcare Mater.*, DOI 10.1002/adhm.202202869

Printed Silk Microelectrode Arrays for Electrophysiological Recording and Controlled Drug Delivery

*Nouran Adly, Tetsuhiko F. Teshima, Hossein Hassani, George Al Boustani, Lennart J.K. Weiß, Gordon Cheng, Joe Alexander and Bernhard Wolfrum\**

## Supporting Information

**Printed silk microelectrode arrays for electrophysiological recoding and controlled drug delivery**

*Nouran Adly, Tetsuhiko F. Teshima, Hossein Hassani, George Al Boustani, Lennart K. Weiß, Gordon Cheng, Joe Alexander, Bernhard Wolfrum\**

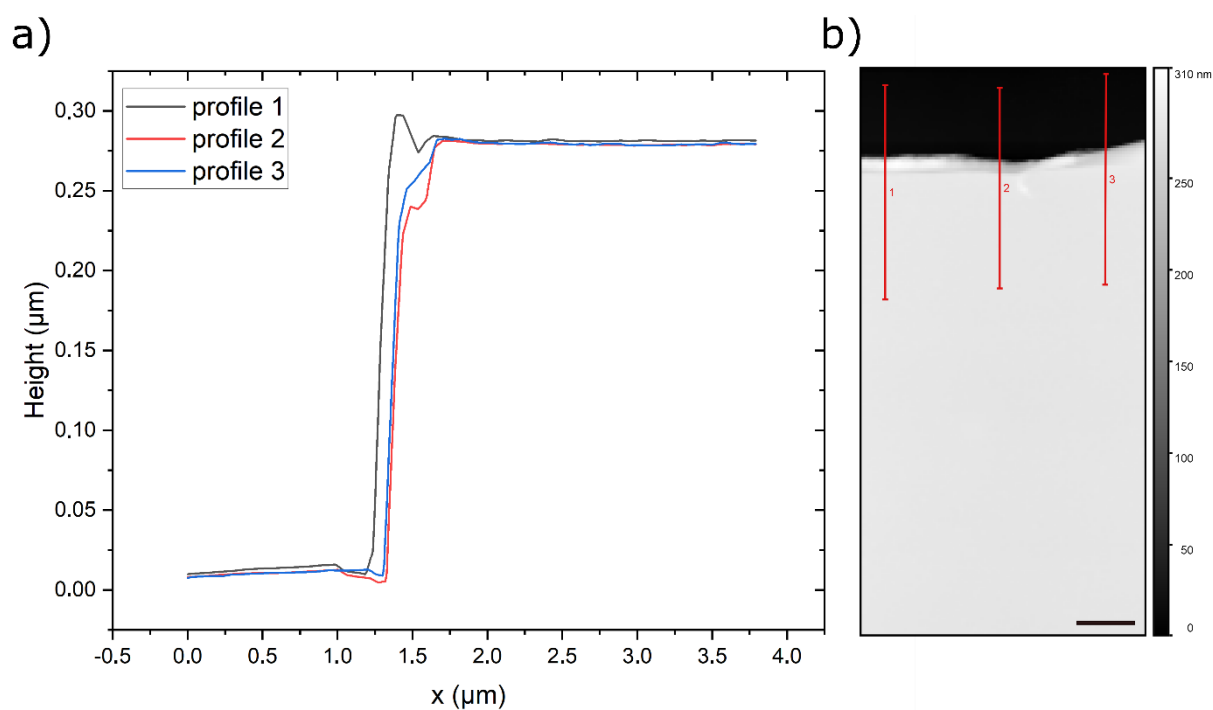

**Figure S1:** a) height profiles of untreated silk layer vs. the substrate, taken along the lines indicated in (b), the AFM height map. (scale bar = 1  $\mu\text{m}$ )

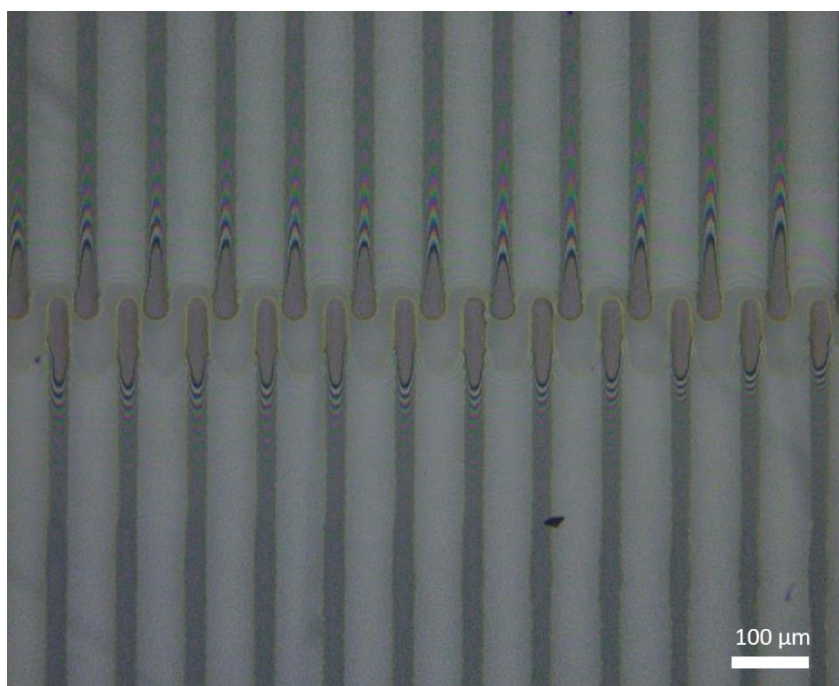

**Figure S2:** Microscopic image of the printed MEA on a silk substrate (scale bar: 100  $\mu\text{m}$ )

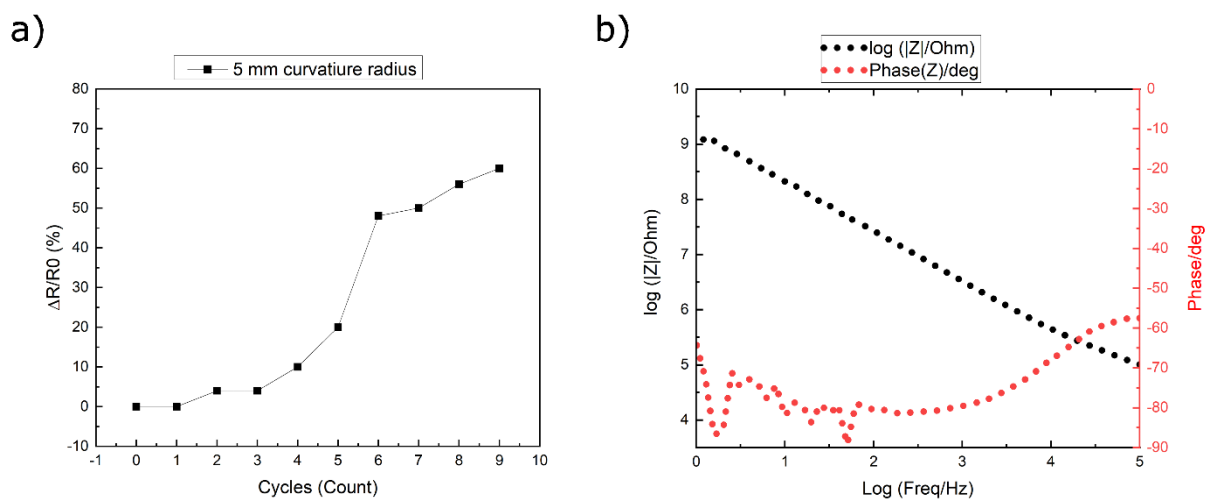

**Figure S3: a)** The bending stability of the silk-carbon electrodes; relative resistance as a function of bending cycles to 5 mm radius of curvature. **b)** Electrochemical impedance spectroscopy of a carbon microelectrode measured in PBS (electrode area  $\sim 2.5 \times 10^3 \mu\text{m}^2$ ).

**Characterization of printed microelectrode arrays:**

To assess whether the printed microelectrode devices remained stable upon bending, we measured the resistance of printed lines after repetitive bending experiment cycles. Hereby, the substrates were bent to a radius of 5 mm and then relaxed; this cycle was repeated several times, after which electrical characterization was performed. **Figure S3a** presents the relative resistance change,  $\Delta R/R_o$ , where  $\Delta R = R - R_o$ , with  $R$  and  $R_o$  being the resistance of the structure when bent and relaxed, respectively. As presented in **Figure S3a**, after a bending radius of 5 mm had been achieved over 4 cycles, a 10% increase in resistance was observed.

**Figure S3b** presents the typical Bode spectra measured in PBS for a printed silk carbon microelectrode.

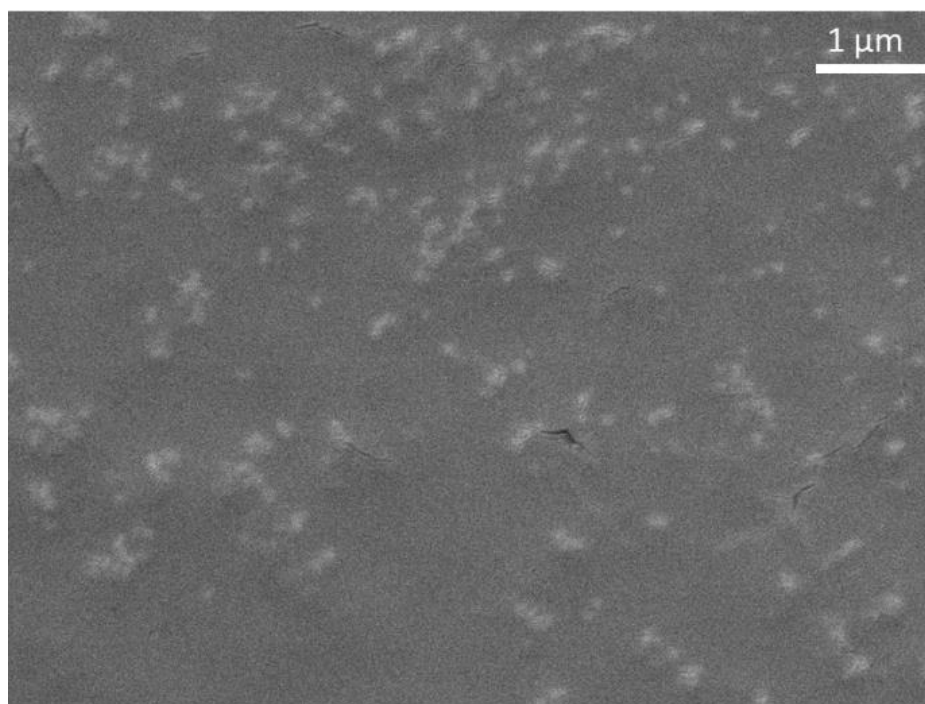

**Figure S4:** SEM image of printed SF-Carbon film without applying voltage

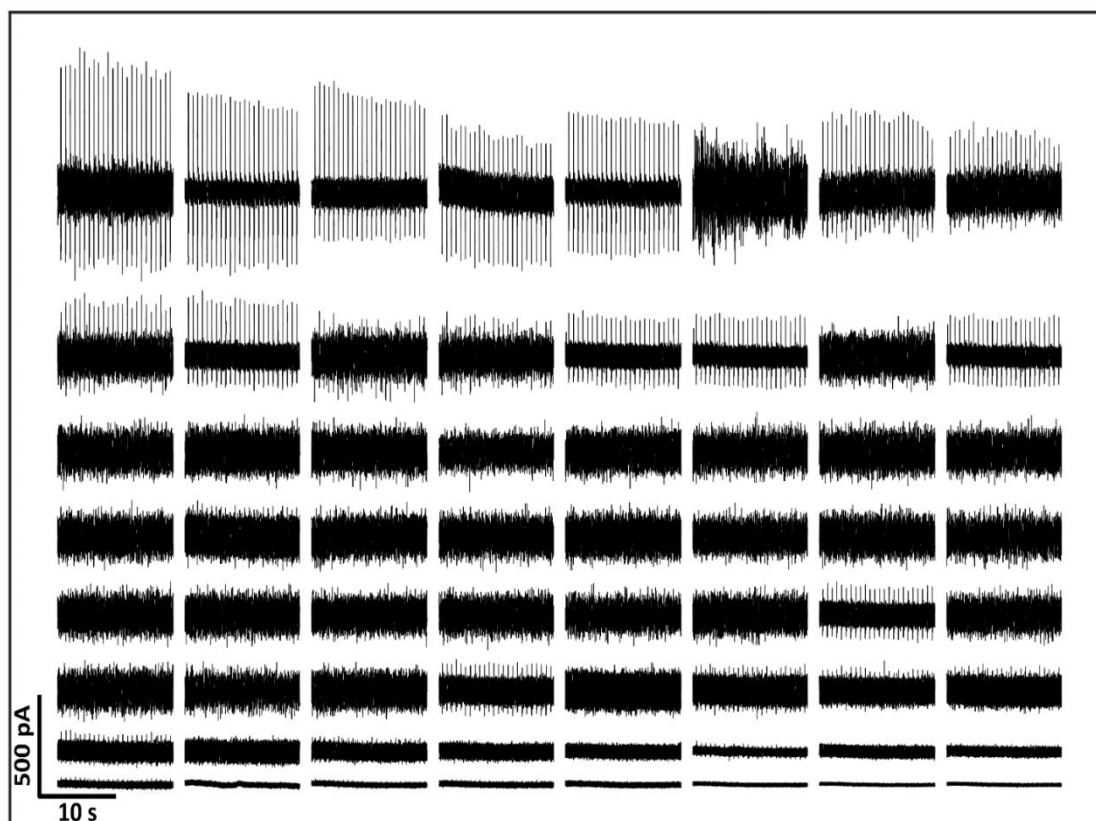

**Figure S5:** A representative recording from 62 recording channels of a single chip; recordings are organized according to descending signal amplitude.
